# Supplementary material for: Biochemical and structural basis for YTH domain of human YTHDC1 binding to methylated adenine in DNA
Source: PubMed Central journal article supplement — Nucleic Acids Res. 2020 Jul 14;48(18):10329–41. doi: 10.1093/nar/gkaa604 (PMC7544203; doi:10.1093/nar/gkaa604), 2020-07-14
Supplement: gkaa604_supplemental_file.pdf [file gkaa604_supplemental_file.pdf]

## **Supplementary Data**

### **Biochemical and structural basis for YTH domain of human YTHDC1 binding to methylated adenine in DNA**

Clayton B. Woodcock<sup>1,3</sup>, John R. Horton<sup>1,3</sup>, Jujun Zhou<sup>1</sup>, Mark T. Bedford<sup>1</sup>, Robert M. Blumenthal<sup>2</sup>, Xing Zhang<sup>1,4</sup>, Xiaodong Cheng<sup>1,4</sup>

<sup>1</sup>Department of Epigenetics and Molecular Carcinogenesis, University of Texas MD Anderson Cancer Center, Houston, TX 77030, USA

<sup>2</sup>Department of Medical Microbiology and Immunology, and Program in Bioinformatics, The University of Toledo College of Medicine and Life Sciences, Toledo, OH 43614, USA

<sup>3</sup>These authors wish it to be known that, in their opinion, the first two authors should be regarded as Joint First Authors: C.B.W. and J.R.H.

<sup>4</sup>To whom correspondence may be addressed: xzhang21@mdanderson.org;  
xcheng5@mdanderson.org

Email addresses of all authors:

CBW (CBWoodcock@mdanderson.org); JRH (JRHorton@mdanderson.org); JZ

(JZhou12@mdanderson.org); MTB (mtbedford@mdanderson.org);

RMB (robert.blumenthal@utoledo.edu); XZ (xzhang21@mdanderson.org);

XC (xcheng5@mdanderson.org)

**6 Figures and 2 Tables**

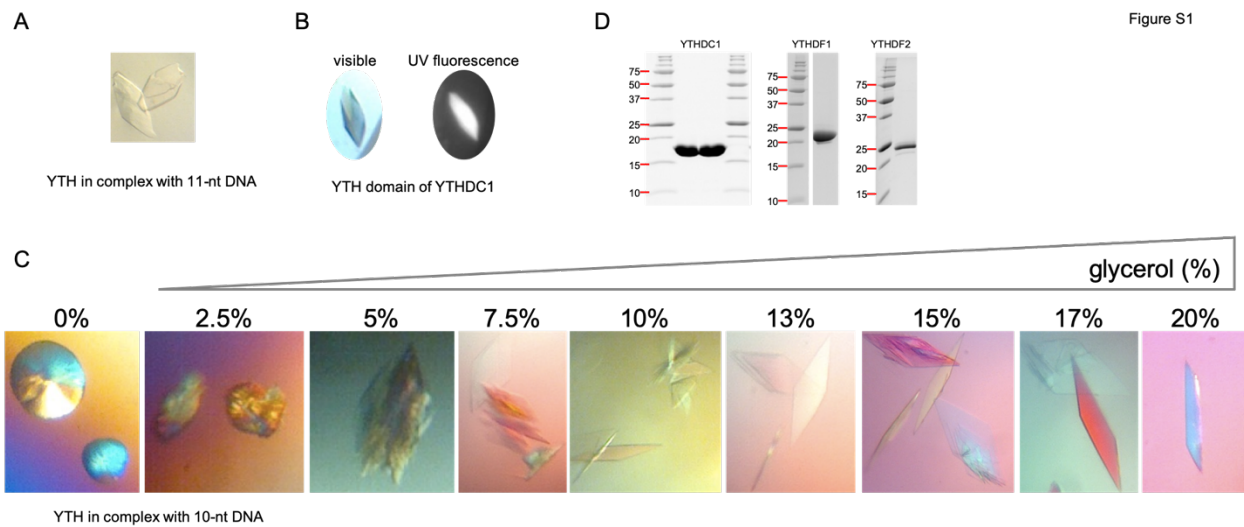

**Figure S1.** Crystals of YTH of YTHDC1 in complex with DNA. **(A)** Examples of crystals of YTHDC1 YTH domain in complex with 11-nt DNA. **(B)** Example of crystal of YTHDC1 YTH domain without DNA. **(C)** Crystallization of YTH-DNA (10-nt) under increased glycerol concentration. **(D)** Examples of purified YTH domains in 18% PAGE used in the study.

Figure S2

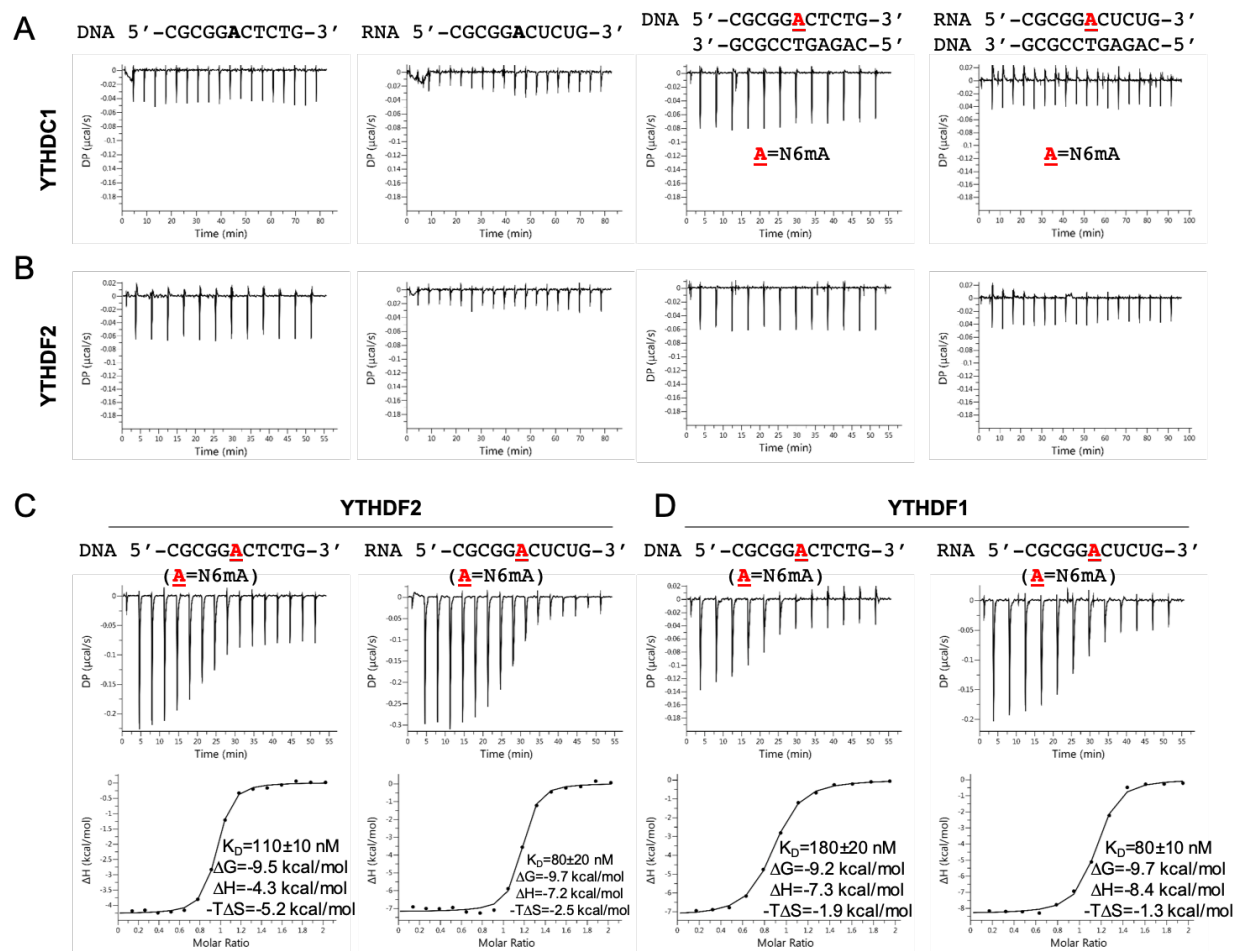

**Figure S2.** (A–B) ITC measurements of YTHDC1 (panel A) and YTHDF2 (panel B) with oligonucleotides containing no modifications or hemi-methylated double-stranded DNA or RNA/DNA hybrid as indicated on top of panels. (C–D) ITC measurements of YTHDF2 (panel C) and YTHDF1 (panel D) binding methylated ssDNA or methylated ssRNA.

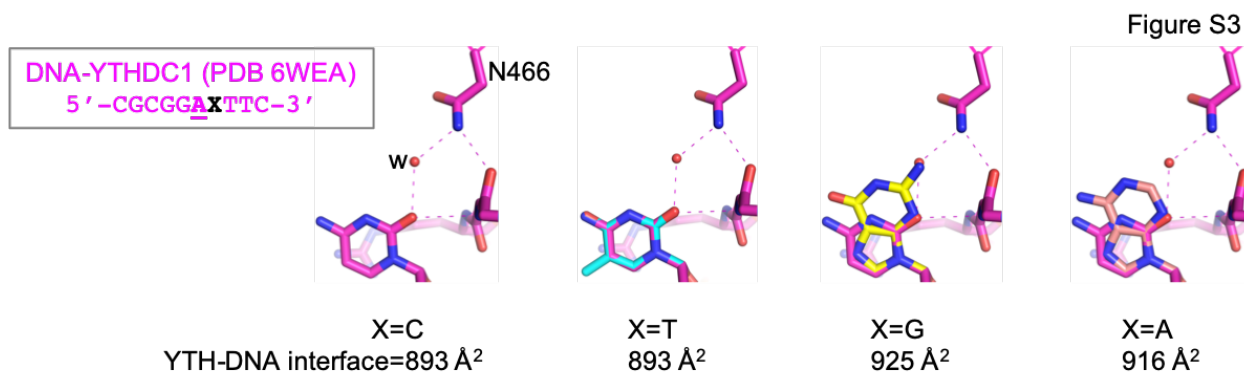

**Figure S3.** A model of varied nucleotide (X=C, T, G and A) immediately after N6mA, with calculated YTH-DNA interface. The protein residue Arg475 is in the background for stacking with the base. A larger purine base (G and A) would increase the interface with Arg475. The guanine N2 atom could replace the water-mediated interaction with the side chain of Asn466.

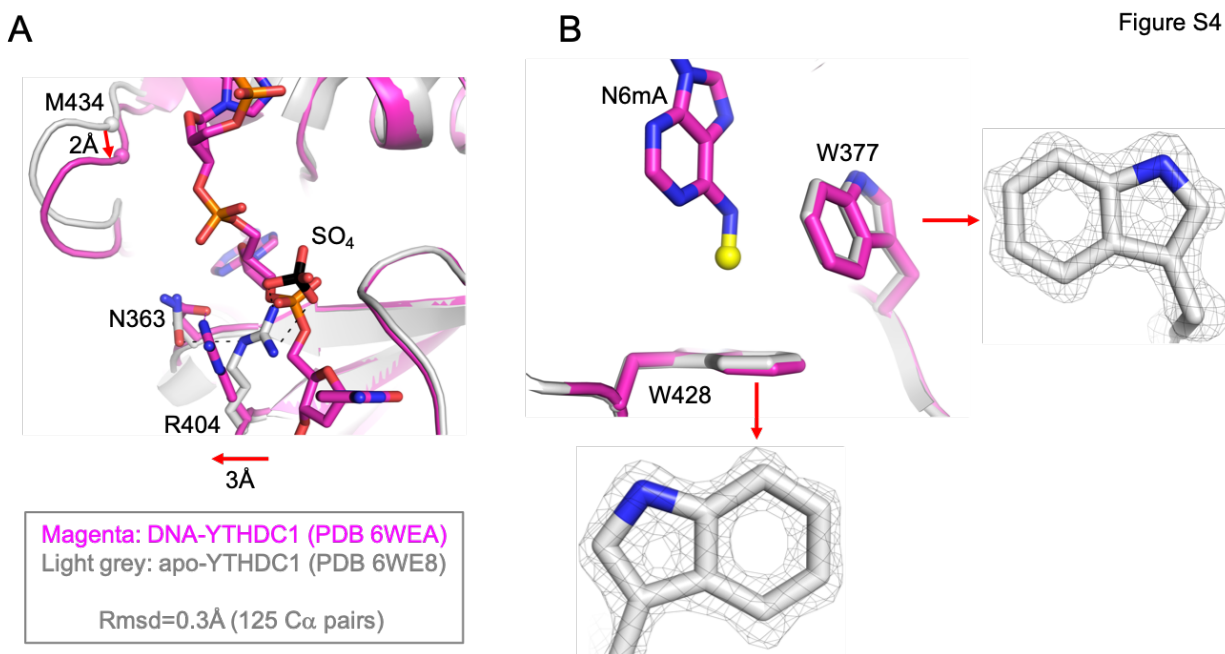

**Figure S4.** Comparison of YTH domain of YTHDC1 in the presence and absence of DNA. **(A)** The concurrent movement of Met434-containing loop and Arg404 upon DNA binding. **(B)** The N6mA-binding aromatic cage is rigid. The electron density ( $2F_o - F_c$ ) is contoured at  $2\sigma$  above the mean for Trp428 and Trp377 respectively.

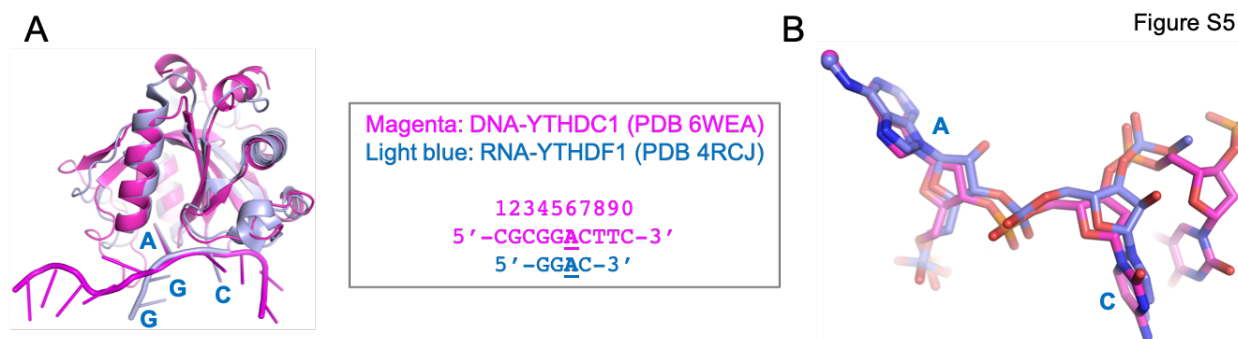

**Figure S5.** Comparison of YTHDC1-DNA and YTHDF1-RNA interactions. **(A)** Superimposition of the two YTH structures. Note only the N6mA-C dinucleotides are superimposable. **(B)** The cytosine base is rotated 180° along the glycosidic bond.

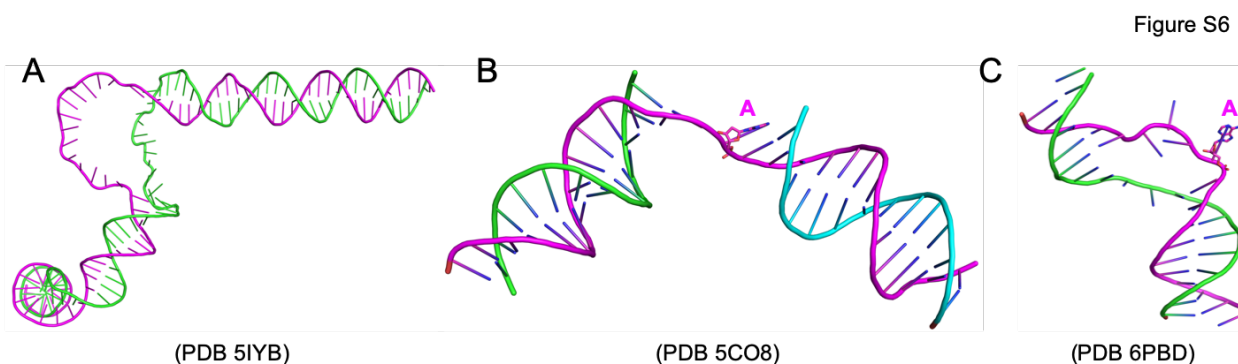

**Figure S6. Examples of DNA structures deviating from non-B conformation.** **(A)** Human transcription promoter opening results in strand separation (PDB 5IYB). **(B)** The Holliday junction-resolving enzyme bound to product DNA containing a single-base gap at the bent position (PDB 5CO8). **(C)** CcrM-bound strand separation with a flipped-out adenine (PDB 6PBD).

Table S1. Summary of X-ray data collection at wavelength=1Å and refinement statistics (\*)

| PDB ID                                                          | 6WE8                   | 6WE9                       | 6WEA                   |
|-----------------------------------------------------------------|------------------------|----------------------------|------------------------|
| DNA (A=N6mA)                                                    | none                   | 5'-CGCGGACTCTG-3'          | 5'-CGCGGACTTC-3'       |
| Space group                                                     | $P2_1$                 | $C2$                       | $P2_1$                 |
| Cell dimensions (Å)                                             | 39.91, 103.96, 42.20   | 119.97, 42.54, 90.02       | 82.94, 42.64, 119.87   |
| $\alpha, \beta, \gamma$ (°)                                     | 90, 104.9, 90          | 90, 103.5, 90              | 90, 92.4, 90           |
| Resolution (Å)                                                  | 20.01-1.18 (1.22-1.18) | 35.31-1.59 (1.65-1.59)     | 40.59-1.79 (1.85-1.79) |
| <sup>a</sup> $R_{\text{merge}}$                                 | 0.072 (0.579)          | 0.204 (0.693)              | 0.134 (0.889)          |
| $R_{\text{pim}}$                                                | 0.038 (0.517)          | 0.094 (0.543)              | 0.083 (0.678)          |
| $CC_{1/2}, CC$                                                  | (0.410, 0.763)         | (0.468, 0.799)             | (0.645, 0.886)         |
| <sup>b</sup> $\langle I/\sigma I \rangle$                       | 22.2 (1.2)             | 10.4 (1.9)                 | 8.7 (1.1)              |
| Completeness (%)                                                | 86.1 (see below)       | 91.6 (63.6)                | 96.9 (84.3)            |
|                                                                 | 1.33-1.27 (89.2)       |                            |                        |
|                                                                 | 1.27-1.22 (55.6)       |                            |                        |
|                                                                 | 1.22-1.18 (26.5)       |                            |                        |
| Redundancy                                                      | 5.8 (1.4)              | 4.7 (1.7)                  | 3.4 (2.2)              |
| Observed reflections                                            | 536,287                | 253,407                    | 251,926                |
| Unique reflections                                              | 93,137 (2,859)         | 54,367 (3,725)             | 73,744 (6,380)         |
| <b>Refinement</b>                                               |                        |                            |                        |
| Resolution (Å)                                                  | 1.18                   | 1.59                       | 1.79                   |
| No. reflections                                                 | 93,024                 | 54,294                     | 73,624                 |
| <sup>c</sup> $R_{\text{work}}$ / <sup>d</sup> $R_{\text{free}}$ | 0.167 / 0.195          | 0.222 / 0.246              | 0.210 / 0.237          |
| No. Atoms (ASU)                                                 | 2 proteins             | 2 complexes                | 4 complexes            |
| Protein                                                         | 2642                   | 2523                       | 5170                   |
| DNA                                                             | -                      | 390                        | 804                    |
| Solvent                                                         | 454                    | 228                        | 612                    |
| B Factors (Å <sup>2</sup> )                                     |                        | Mol A / Mol B <sup>e</sup> |                        |
| Protein                                                         | 17.8                   | 25.4 / 110.0               | 26.7                   |
| DNA                                                             | -                      | 48.1 / 94.8                | 23.2                   |
| Solvent                                                         | 31.6                   | 38.6                       | 27.2                   |
| <b>R.m.s. deviations</b>                                        |                        |                            |                        |
| Bond lengths (Å)                                                | 0.002                  | 0.003                      | 0.004                  |
| Bond angles (°)                                                 | 0.6                    | 0.6                        | 0.7                    |

\* Values in parenthesis correspond to highest resolution shell.

<sup>a</sup>  $R_{\text{merge}} = \sum |I - \langle I \rangle| / \sum I$ , where  $I$  is the observed intensity and  $\langle I \rangle$  is the averaged intensity from multiple observations.

<sup>b</sup>  $\langle I/\sigma I \rangle =$  averaged ratio of the intensity ( $I$ ) to the error of the intensity ( $\sigma I$ ).

<sup>c</sup>  $R_{\text{work}} = \sum |F_{\text{obs}} - F_{\text{cal}}| / \sum |F_{\text{obs}}|$ , where  $F_{\text{obs}}$  and  $F_{\text{cal}}$  are the observed and calculated structure factors, respectively.

<sup>d</sup>  $R_{\text{free}}$  was calculated using a randomly chosen subset (5%) of the reflections not used in refinement.

<sup>e</sup> One complex (B) of two in the asymmetric unit has much weaker electron density and averages of each are given.

**Table S2. Comparison of three YTH-Domain Protein Orthologous Groups Across Vertebrate Classes**  
(cyan or white on black=invariant in all three protein families; white letter on red=residues interaction with N6mA and the 3' cytosine)

| YTHDC1         |     | 361/2                                     | 377                             |                               |                                     |
|----------------|-----|-------------------------------------------|---------------------------------|-------------------------------|-------------------------------------|
| Mammalia       | 345 | TSKLYVLQDARFFLIKSNHNHENVSLAKAKGV          | STLPLVNEKKNLNAFRSA---RSVILIFSVR |                               |                                     |
| Aves           | 322 | TSKGYILQDARFFLIKSNHNHENVSLAKAKGV          | STLPLVNEKKNLNAFRSA---RSVILIFSVR |                               |                                     |
| Reptilia       | 311 | TSRLKYILQDARFFLIKSNHNHENVSLAKAKGV         | STLPLVNEKKNLNAFRSA---RSVILIFSVR |                               |                                     |
| Amphibia       | 325 | TNKIRYILQEARFFLIKSNHNHENVSLAKAKGV         | STLPLVNEKKNLNAFRSA---RSVILIFSVR |                               |                                     |
| Osteichthyes   | 342 | TSKLYILRDARFFLIKSNHNHENVSLAKAKGV          | STLPLVNEKKNLNAFRSA---RSVILIFSVR |                               |                                     |
| Chondrichthyes | 361 | TSKLYILRDARFFLIKSNHNHENVSLAKAKGV          | STLPLVNEKKNLNAFRSA---RSVILIFSVR |                               |                                     |
| YTHDF1         |     |                                           |                                 |                               |                                     |
| Mammalia       | 332 | VESHPVLEKLAHAHSYNPKDFEWNLKNGRVFI          | IKSYSEDDIHS IKYSIWCSTEHGNKRLD   |                               |                                     |
| Aves           | 334 | GESHPVLEKLAHAHSYNPKDFEWNLKNGRVFI          | IKSYSEDDIHS IKYSIWCSTEHGNKRLD   |                               |                                     |
| Reptilia       | 332 | GESHPVLEKLAHAHSYNPKDFEWNLKNGRVFI          | IKSYSEDDIHS IKYSIWCSTEHGNKRLD   |                               |                                     |
| Amphibia       | 332 | NESHPVLEKLAHAHSYNPKDFEWNLKNGRVFI          | IKSYSEDDIHS IKYSIWCSTEHGNKRLD   |                               |                                     |
| Osteichthyes   | 339 | AESHPVLEKLAHAHSYNPKDFEWNLKNGRVFI          | IKSYSEDDIHS IKYSIWCSTEHGNKRLD   |                               |                                     |
| Chondrichthyes | 333 | NETHPVLEKLAHAHSYNPKDFEWNLKNGRVFI          | IKSYSEDDIHS IKYSIWCSTEHGNKRLD   |                               |                                     |
| YTHDF2         |     |                                           |                                 |                               |                                     |
| Mammalia       | 391 | KLRSINNYNPKDFDWNPKHGRVFI                  | IKSYSEDDIHS IKYNIWCSTEHGNKRLD   |                               |                                     |
| Aves           | 393 | KLRSINNYNPKDFDWNPKHGRVFI                  | IKSYSEDDIHS IKYNIWCSTEHGNKRLD   |                               |                                     |
| Reptilia       | 392 | KLRSINNYNPKDFDWNPKHGRVFI                  | IKSYSEDDIHS IKYNIWCSTEHGNKRLD   |                               |                                     |
| Amphibia       | 412 | KLRSVNNYNPKDFDWNPKHGRVFI                  | IKSYSEDDIHS IKYNIWCSTEHGNKRLD   |                               |                                     |
| Osteichthyes   | 335 | KLRSVNNYNPKDFDWNPKHGRVFI                  | IKSYSEDDIHS IKYSIWCSTEHGNKRLD   |                               |                                     |
| Chondrichthyes | 376 | KLKAAHSYNPKDFDWNLKNGRVFI                  | IKSYSEDDIHS IKYSIWCSTEHGNKRLD   |                               |                                     |
| YTHDC1         |     | 428                                       | 466                             | 475/6                         |                                     |
| Mammalia       |     | ESGKFGQGFARLSS                            | ESHGGSP                         | IHWVLPAGMSAKMLGGVFKIDWICRREL  | PFTKSAHLTNPWNEHKPKVIGRGOEIELECGTQL  |
| Aves           |     | ESGKFGQGFARLSS                            | ESHGGSP                         | IHWVLPAGMNAKMLGGVFKIDWICRREL  | PFTKSAHLTNPWNEHKPKVIGRGOEIEPECGTQL  |
| Reptilia       |     | ESGKFGQGFARLSS                            | ESHGGSP                         | IHWVLPAGMNAKMLGGVFKIDWICRREL  | PFTKSHLNPWNEHKPKVIGRGOEIEICGTQL     |
| Amphibia       |     | ESGKFGQGFARLSS                            | ESHGGSP                         | IHWVLPAGMNAKMLGGVFKIDWICRREL  | PFTKCVHLTNPWNEHKPKVIGRGOEIEPCGTQL   |
| Osteichthyes   |     | ESGKFGQGFARLSS                            | ESHGGSP                         | IHWVLPAGMNAKMLGGVFRIDWICRREL  | PFTKTAHLNPWNEHKPKVIGRGOEIEPECGTQL   |
| Chondrichthyes |     | ESGKFGQGFARLSS                            | ESHGGSP                         | IHWVLPAGMNAKMLGGVFKIDWICRREL  | PFTKTGHLVNLWNEHKPKVIGRGOEIEPECGTQL  |
| YTHDF1         |     |                                           |                                 |                               |                                     |
| Mammalia       |     | GSGHFCGVAEMKS                             | PVDYGTSA                        | GVWSQD-----KWKGKFDVQWIFVKDVP  | NNQLRHIRLENNDNKPVNTNSRDTQEVPLEKAKQV |
| Aves           |     | GSGHFCGVAEMKS                             | PVDYGTSA                        | GVWSQD-----KWKGKFDVQWIFVKDVP  | NNQLRHIRLENNDNKPVNTNSRDTQEVPLEKAKQV |
| Reptilia       |     | GSGHFCGVAEMKS                             | PVDYGTSA                        | GVWSQD-----KWKGKFDVQWIFVKDVP  | NNQLRHIRLENNDNKPVNTNSRDTQEVPLEKAKQV |
| Amphibia       |     | GSGHFCGVAEMKS                             | PVDYGTSA                        | GVWSQD-----KWKGKFDVQWIFVKDVP  | NNQLRHIRLENNDNKPVNTNSRDTQEVPLEKAKLV |
| Osteichthyes   |     | GSGHFCGVAEMKS                             | PVDYGTSA                        | GVWSQD-----KWKGKFDVQWIFVKDVP  | NNQLRHIRLENNDNKPVNTNSRDTQEVPLEKAKQV |
| Chondrichthyes |     | GSGHFCGVAEMKS                             | PVDYGTSA                        | GVWSQD-----KWKGKFDVQWIFVKDVP  | NNQLRHIRLENNDNKPVNTNSRDTQEVPLEKAKQV |
| YTHDF2         |     |                                           |                                 |                               |                                     |
| Mammalia       |     | GSGHFCGVAEMKS                             | AVDYNTCA                        | GVWSQD-----KWKGRFDVRIWIFVKDVP | NSQLRHIRLENNENKPVNTNSRDTQEVPLEKAKQV |
| Aves           |     | GSGHFCGVAEMKS                             | AVDYNTCA                        | GVWSQD-----KWKGRFDVRIWIFVKDVP | NSQLRHIRLENNENKPVNTNSRDTQEVPLEKAKQV |
| Reptilia       |     | GSGHFCGVAEMKS                             | AVDYNTCA                        | GVWSQD-----KWKGRFDVRIWIFVKDVP | NSQLRHIRLENNENKPVNTNSRDTQEVPLEKAKQV |
| Amphibia       |     | GSGHFCGVAEMKS                             | AVDYNTCA                        | GVWSQD-----KWKGRFDVRIWIFVKDVP | NSQLRHIRLENNENKPVNTNSRDTQEVPLDKARQV |
| Osteichthyes   |     | GSGHFCGVAEMKS                             | AVDYNTCA                        | GVWSQD-----KWKGRFDVRIWIFVKDVP | NSQLRHIRLENNENKPVNTNSRDTQEVPLEKAKQV |
| Chondrichthyes |     | GSGHFCGVAEMKS                             | AVDYNTCA                        | GVWSQD-----KWKGRFDVRIWIFVKDVP | NSQLRHIRLENNENKPVNTNSRDTQEVPLEKAKLV |
| YTHDC1         |     | GenBank #                                 |                                 | Species                       |                                     |
| Mammalia       |     | CLLFPPDESIDLYQVIHKMRH                     | 509 NP_001026902.1              | <i>Homo sapiens</i>           |                                     |
| Aves           |     | CLLFPPDESIDLYQVIHKMRH                     | 486 XP_025005419.1              | <i>Gallus gallus</i>          |                                     |
| Reptilia       |     | CLLFPPDESIDLYQVIHKMRH                     | 495 XP_003222405.1              | <i>Anolis carolinensis</i>    |                                     |
| Amphibia       |     | CLLFPPDESIDLYQVIHKMRH                     | 489 XP_012815913.1              | <i>Xenopus tropicalis</i>     |                                     |
| Osteichthyes   |     | CLLFPPDESIDLYQVIHKMRH                     | 506 XP_015218249.1              | <i>Lepisosteus oculatus</i>   |                                     |
| Chondrichthyes |     | CLLFPPDESIDLYQVIHKMRH                     | 527 XP_020370216.1              | <i>Rhincodon typos</i>        |                                     |
| YTHDF1         |     |                                           |                                 |                               |                                     |
| Mammalia       |     | LKI IASYKHTTSIFDDFSHYEKRQEEEEVVRKERQSRNKQ | 559 NP_060268.2                 |                               |                                     |
| Aves           |     | LKI IATYKHTTSIFDDFSHYEKRQEEEEVVRKVNLLKNLF | 568 XP_015151870.2              |                               |                                     |
| Reptilia       |     | LKI IATYKHTTSIFDDFSHYEKRQEEEEVVRKERQNRNKQ | 560 XP_003220752.1              |                               |                                     |
| Amphibia       |     | LKI IATYKHTTSIFDDFSHYEKRQEEEEVVRKVMAPDSC  | 565 NP_989392.1*                |                               |                                     |
| Osteichthyes   |     | LKI IATYKHTTSIFDDFSHYEKRQEEEEVVRKNFEPPLIQ | 565 XP_006639659.1              |                               |                                     |
| Chondrichthyes |     | LKI IATYKHTTSIFDDFSHYEKRQEEEEVVRKDKISLPVA | 560 XP_020386177.1              |                               |                                     |
| YTHDF2         |     |                                           |                                 |                               |                                     |
| Mammalia       |     | LKI IASYKHTTSIFDDFSHYEKRQEEEEVVKKERQGRGK  | 579 NP_001166599.1              |                               |                                     |
| Aves           |     | LKI IATYKHTTSIFDDFSHYEKRQEEENVKKERQGRVK   | 581 XP_015153209.1              |                               |                                     |
| Reptilia       |     | LKI IATYKHTTSIFDDFSHYEKRQEEETVKKERQGRVK   | 580 XP_003229643.1              |                               |                                     |
| Amphibia       |     | LKI IASYKHTTSIFDDFSHYEKRQEEEEVVKVEVQGS    | 600 NP_989392.1*                |                               |                                     |
| Osteichthyes   |     | LKI IASYKHTTSIFDDFSHYEKRQEEECVVKKERQGRVK  | 523 XP_006631512.1              |                               |                                     |
| Chondrichthyes |     | LKI IATYKHTTSIFDDFSHYEKRQEEEVVRKVMAPDSC   | 564 XP_020366751.1              |                               |                                     |

**Notes:** \* = same ortholog was best *X. tropicalis* hit for both YTHDF1 and YTHDF2; for *L. camtschaticum*, no match was found having expect score of  $\leq 10$ .
